# Supplementary material
Source: MDPI journal article supplement (https://www.mdpi.com/2071-1050/12/12/4909)
Supplement: s1 [file s1]

1 **Table S1.** CFA results based on the initial and modified calculations.

| Item                                                                             | Initial               | Modified       |
|----------------------------------------------------------------------------------|-----------------------|----------------|
|                                                                                  | Factor loading        | Factor loading |
| <b>Intention to eat sustainably (INT)</b>                                        |                       |                |
| Next month, I intend to buy...                                                   |                       |                |
| ... preferably vegetable food. (INT01)                                           | 0.600                 | 0.598          |
| ... organic food. (INT02)                                                        | 0.669                 | 0.682          |
| ... local products. (INT03)                                                      | 0.725                 | 0.726          |
| ... seasonal products. (INT04)                                                   | 0.551                 | 0.537          |
| ... preferably minimally processed food. (INT05)                                 | 0.419                 | EXC            |
| ... fair trade products. (INT06)                                                 | 0.613                 | 0.617          |
| ... only as much food as I really need. (INT07)                                  | 0.045 <sup>n.s.</sup> | EXC            |
| <b>Attitudes towards sustainable nutrition (ATT)</b>                             |                       |                |
| To eat sustainably is ... for me.                                                |                       |                |
| ... very undesirable—very desirable ... (ATT01)                                  | 0.679                 | 0.672          |
| ... very bad—very good ... (ATT02)                                               | 0.758                 | 0.774          |
| ... very harmful—very beneficial ... (ATT03)                                     | 0.689                 | 0.708          |
| ... very unhealthy—very healthy... (ATT04)                                       | 0.681                 | 0.705          |
| ... very unimportant—very important ... (ATT05)                                  | 0.782                 | 0.768          |
| ... very exhausting—very easy... (ATT06)                                         | 0.359                 | EXC            |
| <b>Subjective norm (SN)</b>                                                      |                       |                |
| Most people who are important to me think that I should eat sustainably. (SN01)  | 0.903                 | 0.918          |
| My family thinks that I should eat sustainably. (SN02)                           | 0.810                 | 0.813          |
| My friends think that I should eat sustainably. (SN03)                           | 0.844                 | 0.816          |
| My lecturers think that I should eat sustainably. (SN04)                         | 0.389                 | EXC            |
| <b>Perceived behavioral control (PBC)</b>                                        |                       |                |
| To eat sustainably is... very impossible—very possible ... for me. (PBC01)       | 0.762                 | 0.784          |
| For me, achieving sustainable nutrition is ... very difficult—very easy. (PBC02) | 0.811                 | 0.812          |
| If I wanted to, it would be easy for me to eat sustainably. (PBC03)              | 0.673                 | 0.633          |
| The decision to eat sustainably underlies my complete control. (PBC04)           | 0.444                 | EXC            |
| <b>Nature relatedness (NR)</b>                                                   |                       |                |
| My ideal vacation spot would be a remote, wilderness area. (NR01)                | 0.672                 | 0.668          |
| I always think about how my actions affect the environment. (NR02)               | 0.555                 | 0.550          |
| My connection to nature and the environment is a part of my spirituality. (NR03) | 0.598                 | 0.597          |
| I take notice of wildlife wherever I am. (NR04)                                  | 0.636                 | 0.633          |
| My relationship to nature is an important part of who I am. (NR05)               | 0.839                 | 0.831          |
| I feel very connected to all living things and the Earth. (NR06)                 | 0.767                 | 0.770          |
| <b>Environmental concern (EC)</b>                                                |                       |                |
| <b>Egoistic concern (ego)</b>                                                    |                       |                |
| I am concerned about environmental problems because of the consequences for...   |                       |                |
| ... me. (ECego1)                                                                 | 0.836                 | 0.836          |
| ... my lifestyle. (ECego2)                                                       | 0.677                 | 0.675          |
| ... my health. (ECego3)                                                          | 0.639                 | 0.635          |
| ... my future. (ECego4)                                                          | 0.562                 | 0.562          |

|                                    |       |       |
|------------------------------------|-------|-------|
| Altruistic concern (alt)           |       |       |
| ... people in my country. (ECalt1) | 0.681 | 0.685 |
| ... all people. (ECalt2)           | 0.774 | 0.772 |
| ... children. (ECalt3)             | 0.736 | 0.741 |
| ... future generations. (ECalt4)   | 0.629 | 0.629 |
| Biospheric concern (bio)           |       |       |
| ... plants. (ECbio1)               | 0.910 | 0.899 |
| ... marine life. (ECbio2)          | 0.952 | 0.951 |
| ... birds. (ECbio3)                | 0.961 | 0.959 |
| ... mammals. (ECbio4)              | 0.932 | 0.930 |
| Robust CFI                         | 0.896 | 0.928 |
| Robust RMSEA                       | 0.054 | 0.050 |
| SRMR                               | 0.069 | 0.066 |

n.s. = not significant; \*  $p < 0.05$ . All other factor loadings were significant on a  $p \leq 0.001$  level. EXC = excluded item.
